1 **Beyond the biosynthetic gene cluster paradigm: Genome-wide co-expression**  
2 **networks connect clustered and unclustered transcription factors to secondary**  
3 **metabolic pathways**

4  
5 Min Jin Kwon<sup>a</sup>, Charlotte Steiniger<sup>a</sup>, Timothy C. Cairns<sup>a</sup>, Jennifer H. Wisecaver<sup>b,c</sup>,  
6 Abigail Lind<sup>d,e</sup>, Carsten Pohl<sup>a</sup>, Carmen Regner<sup>a</sup>, Antonis Rokas<sup>c,e</sup> and Vera Meyer<sup>a#</sup>

7  
8 <sup>a</sup> Chair of Applied and Molecular Microbiology, Institute of Biotechnology, Technische Universität Berlin,  
9 Berlin, Germany

10 <sup>b</sup> Department of Biochemistry, Center for Plant Biology, Purdue University, West Lafayette, Indiana, USA

11 <sup>c</sup> Department of Biological Sciences, Vanderbilt University, Nashville, Tennessee, USA

12 <sup>d</sup> Gladstone Institute for Data Science and Biotechnology, San Francisco, California, USA

13 <sup>e</sup> Department of Biomedical Informatics, Vanderbilt University School of Medicine, Nashville, Tennessee,  
14 USA

15

16 # Address correspondence to Vera Meyer, [vera.meyer@tu-berlin.de](mailto:vera.meyer@tu-berlin.de)

17 Author ORCIDs:

18 Min Jin Kwon: <https://orcid.org/0000-0002-0171-7092>

19 Charlotte Steiniger: <https://orcid.org/0000-0001-5329-2391>

20 Timothy C. Cairns: <https://orcid.org/0000-0001-7106-224X>

21 Jennifer H. Wisecaver: <https://orcid.org/0000-0001-6843-5906>

22 Abigail Lind: <https://orcid.org/0000-0002-9579-4178>

23 Carmen Regner: <https://orcid.org/0000-0002-4083-6916>

24 Carsten Pohl: <https://orcid.org/0000-0002-3402-9595>

25 Antonis Rokas: <https://orcid.org/0000-0002-7248-6551>

26 Vera Meyer: <https://orcid.org/0000-0002-2298-2258>

27

28 Author email addresses:

29 Min Jin Kwon: [kwon.minjin@gmail.com](mailto:kwon.minjin@gmail.com)

30 Charlotte Steiniger: [c.steiniger@tu-berlin.de](mailto:c.steiniger@tu-berlin.de)

31 Timothy C. Cairns: [t.cairns@tu-berlin.de](mailto:t.cairns@tu-berlin.de)

32 Jennifer H. Wisecaver: [jwisecav@purdue.edu](mailto:jwisecav@purdue.edu)

33 Abigail Lind: [allind89@gmail.com](mailto:allind89@gmail.com)

34 Carsten Pohl: [carsten.pohl@tu-berlin.de](mailto:carsten.pohl@tu-berlin.de)

35 Carmen Regner: [regner@posteo.de](mailto:regner@posteo.de)

36 Antonis Rokas: [antonis.rokas@Vanderbilt.Edu](mailto:antonis.rokas@Vanderbilt.Edu)

37 Vera Meyer: [vera.meyer@tu-berlin.de](mailto:vera.meyer@tu-berlin.de)

## 38 **Abstract**

39 Fungal secondary metabolites are widely used as therapeutics and are vital  
40 components of drug discovery programs. A major challenge hindering discovery of  
41 novel secondary metabolites is that the underlying pathways involved in their  
42 biosynthesis are transcriptionally silent in typical laboratory growth conditions, making it  
43 difficult to identify the transcriptional networks that they are embedded in. Furthermore,  
44 while the genes participating in secondary metabolic pathways are typically found in  
45 contiguous clusters on the genome, known as biosynthetic gene clusters (BGCs), this is  
46 not always the case, especially for global and pathway-specific regulators of pathways'  
47 activities. To address these challenges, we used 283 genome-wide gene expression  
48 datasets of the ascomycete cell factory *Aspergillus niger* generated during growth under  
49 155 different conditions to construct two gene co-expression networks based on  
50 Spearman's correlation coefficients (SCC) and on mutual rank-transformed Pearson's  
51 correlation coefficients (MR-PCC). By mining these networks, we predicted six  
52 transcription factors named MjkA – MjkF to concomitantly regulate secondary  
53 metabolism in *A. niger*. Over-expression of each transcription factor using the Tet-on  
54 cassette modulated production of multiple secondary metabolites. We found that the  
55 SCC and MR-PCC approaches complemented each other, enabling the delineation of  
56 global (SCC) and pathway-specific (MR-PCC) transcription factors, respectively. These  
57 results highlight the great potential of co-expression network approaches to identify and  
58 activate fungal secondary metabolic pathways and their products. More broadly, we  
59 argue that novel drug discovery programs in fungi should move beyond the BGC

60 paradigm and focus on understanding the global regulatory networks in which  
61 secondary metabolic pathways are embedded.

## 62 **Importance**

63 There is an urgent need for novel bioactive molecules in both agriculture and medicine.  
64 The genomes of fungi are thought to contain vast numbers of metabolic pathways  
65 involved in the biosynthesis of secondary metabolites with diverse bioactivities.  
66 Because these metabolites are biosynthesized only under specific conditions, the vast  
67 majority of fungal pharmacopeia awaits discovery. To discover the genetic networks that  
68 regulate the activity of secondary metabolites, we examined the genome-wide profiles  
69 of gene activity of the cell factory *Aspergillus niger* across hundreds of conditions. By  
70 constructing global networks that link genes with similar activities across conditions, we  
71 identified six global and pathway-specific regulators of secondary metabolite  
72 biosynthesis. Our study shows that elucidating the behavior of the genetic networks of  
73 fungi under diverse conditions harbors enormous promise for understanding fungal  
74 secondary metabolism, which ultimately may lead to novel drug candidates.

75

76 **Key words:** filamentous fungi, *Aspergillus niger*, secondary metabolite gene clusters,  
77 gene co-expression, correlation network, natural product, specialized metabolism,  
78 genetic network, gene regulation

## 79 **Introduction**

80 Fungal secondary metabolites (SMs) are bioactive, usually small molecular weight  
81 compounds, which have restricted taxonomic distribution and are produced at specific  
82 stages of growth and development<sup>1</sup>. The most well-known clinical applications of these  
83 molecules include antibiotics, cholesterol-lowering agents, and immunosuppressants  
84 (e.g., penicillin, statins, and cyclosporins, respectively)<sup>2</sup>. However, they also play an  
85 important role in drug discovery programs, with recently marketed therapeutics  
86 consisting of either fungal SMs or their semi-synthetic derivatives<sup>3</sup>. In contrast to these  
87 contributions to human welfare, fungal SMs include potent carcinogenic crop  
88 contaminants<sup>4</sup>, and the mycotoxin-producing capacity of commonly used fungal cell  
89 factories in food or biotechnological processes is often either unknown<sup>5</sup> or  
90 underestimated<sup>6</sup>. Moreover, plant-infecting fungi deploy numerous SMs as virulence  
91 factors that facilitate successful infection<sup>7</sup>, ultimately destroying enough food for 10% of  
92 the human population per year<sup>8</sup>. Improved understanding of the genetic, molecular, and  
93 biochemical aspects of fungal secondary metabolism thus promises to drive novel  
94 medical breakthroughs, while also insuring improvements in global food safety and  
95 security<sup>9</sup>.

96

97 A common feature of SM-producing fungi is that the genes required for producing a  
98 single secondary metabolite are often found in contiguous clusters on the genome,  
99 which may facilitate both horizontal gene transfer of SMs and enable epigenetic  
100 regulation via chromatin remodelling<sup>1,10</sup>. Biosynthetic gene clusters (BGCs) typically  
101 consist of a gene encoding a core biosynthetic enzyme, most commonly a non-

102 ribosomal peptide synthetase (NRPS), polyketide synthase (PKS), or terpene cyclase,  
103 which is responsible for the first metabolic step in product synthesis<sup>11</sup>. Additionally,  
104 BGCs include genes encoding so called ‘tailoring’ enzymes, such as P450  
105 monooxygenases or methyltransferases, which modify the molecule produced by the  
106 core enzyme<sup>11,12</sup>. Moreover, many BGCs contain either putative membrane transporter-  
107 encoding genes, which are required for metabolite efflux from the cell in some<sup>13</sup>, but not  
108 all<sup>14</sup>, cases, or additional so called ‘resistance’ genes, which are necessary for the  
109 detoxification/self-protection against the produced molecules<sup>15</sup>.

110  
111 Most BGCs are transcriptionally silent under standard laboratory and industrial  
112 cultivation conditions, which is a major challenge to the discovery of their cognate  
113 molecules<sup>16</sup>. Interestingly, many BGCs also contain transcription factor (TF)-encoding  
114 genes that regulate their activity<sup>11,12,17</sup>. In several instances, these TF-encoding genes  
115 have been over-expressed to activate transcription of the respective BGC, ultimately  
116 leading to discovery of novel SMs<sup>13,18–21</sup>. However, this strategy cannot be used for the  
117 approximately 40% of fungal BGCs that a resident TF<sup>17</sup>.

118  
119 An alternative approach to engineering SM over-producing isolates has been to identify  
120 and genetically target global regulators of multiple BGCs. These include epigenetic  
121 regulators, notably components of the heterotrimeric velvet complex, which links  
122 development, light responses, and SM production in ascomycetes<sup>22</sup>. Alternatively,  
123 globally acting TFs that coordinate SM biosynthesis with differentiation (e.g., BrlA/StuA)  
124 and responses to environmental stimuli, such as pH (PacC) or nitrogen availability

125 (AreA), can be activated using molecular approaches for elevated natural product  
126 biosynthesis<sup>1,17,23</sup>. A limitation to these strategies, however, is that all global regulators  
127 discovered to date activate only a fraction of the predicted BGCs in a single genome.  
128 For example, deletion of genes predicted to encode the methyltransferase LaeA, which  
129 is thought to silence BGC expression by the formation of transcriptionally silent  
130 heterochromatin, increased expression of 7 out of 17 BGCs in the biomass-degrading  
131 fungus *Trichoderma reesei* and 13 out of 22 BGCs analysed in the human pathogen  
132 *Aspergillus fumigatus*<sup>24,25</sup>.

133  
134 A final confounding factor in understanding and functionally analysing fungal BGCs and  
135 their products is that there is considerable variation to the degree to which core,  
136 tailoring, transport, and regulatory genes are contiguously clustered in fungal  
137 genomes<sup>10</sup>. This includes so called 'partial' clusters in which some genes encoding  
138 biosynthetic enzymes and transporters are not physically linked with other clustered  
139 genes<sup>26,27</sup>, 'superclusters' in which two or more NRPS/PKS encoding genes reside in  
140 close physical proximity<sup>28,29</sup>, and SM biosynthetic genes which are not contiguously  
141 clustered<sup>30</sup>.

142  
143 Consequently, innovative strategies are required to both discover novel transcriptional  
144 activators of BGCs and to accurately delineate their boundaries. Over the past several  
145 years, an approach that has gained considerable interest has been the utilisation of co-  
146 expression networks to analyse BGCs, for example during laboratory culture of  
147 industrial isolates<sup>29,31</sup> or during infectious growth of plant-infecting fungi<sup>32</sup>. A limitation to

148 these studies, however, was the relatively small number of conditions tested (up to  
149 several dozen), which resulted in the inability to detect the transcriptional activity of  
150 numerous BGCs. To overcome this limitation, we recently conducted a meta-analysis of  
151 283 microarray datasets covering 155 different cultivation conditions for the  
152 biotechnologically exploited cell factory *Aspergillus niger*. This data collection covers a  
153 diverse range of environmental conditions and genetic perturbations and was used to  
154 construct a global gene co-expression network based on Spearman's correlation  
155 coefficient (SCC)<sup>33</sup>. We found that 53 out of the 81 predicted BGC core genes in *A.*  
156 *niger* are expressed in at least one out of the 155 conditions, and we were able to  
157 delineate the boundaries of numerous BGCs, including, for example, the partial cluster  
158 required for biosynthesis of the siderophore triacetyl fusarinine C.

159  
160 Our analysis also suggested that only a minority of BGCs are co-expressed with their  
161 resident TF; specifically, from the 25 out of the 53 expressed BGCs that contained a TF,  
162 only 8 BGCs were co-expressed with their respective TF. However, we were able to use  
163 this network to successfully predict global TFs that, independent of their physical  
164 location on the genome, regulate multiple BGCs. This relied on the so-called 'guilt-by-  
165 association' principle, whereby genes that are part of similar (or the same) biosynthetic  
166 pathways or genetic networks tend to have highly comparable patterns of gene  
167 expression. We functionally analyzed two of these co-expressed TFs (Mjka, Mjkb) by  
168 generating loss-of-function and gain-of-function *A. niger* mutants, and could indeed  
169 demonstrate that their overexpression modulated (either indirectly or directly) the  
170 transcriptional activity of 45 (Mjka) and 43 (Mjkb) BGC core genes, respectively<sup>33</sup>.

171

172 Despite the utility of co-expression network analyses, there are several possible  
173 limitations to the construction of transcriptional networks based on correlation  
174 coefficients such as Spearman or Pearson. In these networks, correlation coefficients  
175 are used as weighted edges to connect genes (nodes). One major challenge when  
176 constructing these networks is determining the edge weight threshold below which  
177 correlation coefficients are excluded from the network, with the goal being to remove  
178 non-biologically relevant gene associations. We have previously used *in silico* data  
179 randomization experiments to test the likely threshold of biologically meaningful co-  
180 expression based on Spearman<sup>33</sup>, however, it is still likely that for many BGCs, the  
181 correlation coefficient cut-off chosen ( $\rho \geq |0.5|$ ) may be unnecessarily stringent, resulting  
182 in false negative co-expression relationships for BGCs. Additionally, average correlation  
183 coefficients can vary by gene function and input data<sup>34</sup>. Importantly, in the case of BGC  
184 genes that are only expressed under few or only one specific environmental condition, it  
185 is likely that the expression vector for a given BGC gene will be sparse, and therefore  
186 more likely to artificially correlate with other rarely-expressed genes rather than with  
187 genes with a functional link.

188

189 To overcome these challenges, in this study we reanalyzed the existing *A. niger*  
190 transcriptome dataset with a specific focus on *A. niger* BGCs. Firstly, we generated  
191 gene expression modules based on a mutual rank approach, which can capture  
192 functional relationships for rarely-expressed secondary metabolism genes<sup>34,35</sup>, as we  
193 have previously shown in analyses of secondary metabolism in plants<sup>36</sup>. We compared



194 this mutual rank strategy with our existing Spearman co-expression datasets, and by  
195 integrating both approaches generated a shortlist of six TF- encoding genes (including  
196 *mjkA* and *mjkB*), which we hypothesized may regulate multiple BGCs. Functional  
197 analyses of these genes by overexpression using the Tet-on gene switch revealed they  
198 play multiple roles in growth, development and pigment formation of *A. niger* as  
199 assayed by standard growth tests on medium agar plates and in shake flasks.  
200 Moreover, metabolomic profiling revealed a change in metabolite patterns of analyzed  
201 overexpression strains. Finally, by *in silico* analysis we generated a list of predicted  
202 molecules and associated them with putative BGCs. The methods and resources  
203 developed in this study will thus enable the efficient activation of fungal SMs for novel  
204 drug discovery programs and other studies. More broadly, our general approach holds  
205 potential for deciphering the global regulatory network governing BGCs and secondary  
206 metabolic pathways in fungi.

207

## 208 **Results**

### 209 **Mining co-expression networks to identify biosynthetic and regulatory modules**

210 Using the SCC approach, we previously estimated the global transcriptional activity of  
211 *A. niger* BGCs amongst the 283 microarray experiments by assessing gene expression  
212 of the predicted core enzyme<sup>33</sup>. These data highlighted that BGC expression varies  
213 considerably, with some core enzymes transcriptionally deployed during several dozen  
214 experiments, others expressed in >5, and 28 not expressed under any condition<sup>33</sup>. We  
215 reasoned that this microarray meta-analysis was also a promising resource for further  
216 interrogation of BGCs using the MR-PCC approach. In doing so, modules of co-

217 expressed genes were determined using three different exponential decay rates (see  
218 Materials and Methods). Each different exponential decay rate produces modules with  
219 different qualities; NET25, the most relaxed threshold, has the largest modules, while  
220 NET05, the most stringent threshold, has the smallest modules. In addition, the NET10  
221 exponential decay rate produces modules smaller than the NET25 modules and larger  
222 than the NET05 modules.

223  
224 In total, there were 2,041 modules recovered from the NET25 network, 2,944 modules  
225 recovered from the NET10 network, and 2,999 modules recovered from the NET05  
226 network ([Supplemental Table 1](#)). The median module size for the NET25, NET10, and  
227 NET05 networks was 11, 7, and 5 genes, respectively. Of the 78 predicted BGCs  
228 comprising in total 81 core genes in the *Aspergillus niger* genome, 43 predicted BGCs  
229 had one or more genes recovered within a single module ([Supplemental Table 2](#)).  
230 These 43 BGCs had varying levels of co-expression. For some BGCs, such as the  
231 fumonisin-producing BGC, most genes in the gene cluster are co-expressed at high  
232 levels (**Figure 1A**). For others, either a small subset of the genes in the BGC were not  
233 co-expressed (e.g., BGC 34; **Figure 1B**) or only a small fraction of genes was co-  
234 expressed (e.g., BGC 38, where only 6 / 22 genes in the BGC were co-expressed;  
235 **Figure 1C**). Notably, 7 genes in BGC 38 were co-expressed with 10 genes from BGC 34,  
236 thus forming a metamodule (**Figure 1D**). This metamodule consisted in total of 50 genes,  
237 including one core gene (FAS) and two TFs from BGC 34 and two core genes (PKS,  
238 NRPS) from BGC 38. Concordantly, we could also identify co-expression between BGC  
239 34 and BGC 38 cluster members via the SCC approach. Notably, Multigene BLAST

240 showed that BGC 34 and 38 are conserved in black *Aspergilli* (Supplemental Figure 1).  
241 Both clusters belong to a large SCC sub-network comprised of 1,804 genes (Figure 2),  
242 which is the largest gene co-expression sub-network with BGC genes based on the  
243 Spearman rank coefficient  $\rho \geq |0.5|$ . This sub-network included many TFs that are not  
244 physically located inside BGCs or are co-expressed with non-resident BGC genes.

245  
246 It has been speculated over the last decades that BGC resident TFs may co-regulate  
247 gene expression at more than one BGC<sup>1,17</sup>. Both co-expression network approaches  
248 supported this hypothesis for *A. niger*, as evidenced by the co-expression of two TFs  
249 residing in BGC 34 (An08g11000 and An08g10880, chromosome 1) with multiple genes  
250 at BGC 38 (chromosome 8), including the predicted NRPS (Figure 3). This was  
251 especially interesting given that (i) BGC 38 does not contain a predicted TF; (ii) both  
252 these BGCs are present in 22 (BGC 34) or 24 (BGC 38) of 83 analyzed genomes of the  
253 genus *Aspergillus*, and (iii) BGC 38 is in close proximity to the functionally characterized  
254 BGC 39 necessary for azanigerone production<sup>37</sup>.

255  
256  
257 Interestingly, our analysis demonstrates that the SCC approach primarily carves out co-  
258 expression of frequently expressed genes, whereas the strength of the MR-PCC  
259 approach is the identification co-expression relationships amongst rarely expressed  
260 genes. We thus decided to study the impact of six putative TF-encoding genes on *A.*  
261 *niger* secondary metabolism in more depth. Four were predicted by the SCC approach  
262 to be co-expressed with at least 10 BGC core genes and are unclustered (MjkA-MjkD),

263 whereas the remaining two were predicted by the MR-PCC approach to be co-  
264 expressed with both BGC 34 and 38 and are clustered with BGC 34 (MjkE, MjkF; **Table**  
265 **1, Figure 3**).

266

267 **Table 1:** Selected list of transcription factors analyzed in this study, which are co-expressed with BGCs in  
268 *A. niger*.

| Name | ORF code   | No. of co-expressed BGC core genes (SCC) | No. of co-expressed BGC core genes (MR-PCC) | Clustered in a BGC | Tet-on based overexpression phenotype on solid growth medium |
|------|------------|------------------------------------------|---------------------------------------------|--------------------|--------------------------------------------------------------|
| MjkA | An07g07370 | 14                                       | -                                           | no                 | Red pigment formation, reduced growth, sclerotia formation   |
| MjkB | An12g07690 | 13                                       | -                                           | no                 | Red pigment formation                                        |
| MjkC | An01g14020 | 17                                       | -                                           | no                 | Yellow pigment formation, reduced growth                     |
| MjkD | An07g02880 | 10                                       | -                                           | no                 | Yellow pigment formation                                     |
| MjkE | An08g11000 | 13                                       | 1                                           | yes (BGC 34)       | Brown pigment formation                                      |
| MjkF | An08g10880 | 15                                       | 1                                           | yes (BGC 34)       | Reduced growth, frequent reversions                          |

269

270

271

272

273

274

275

276

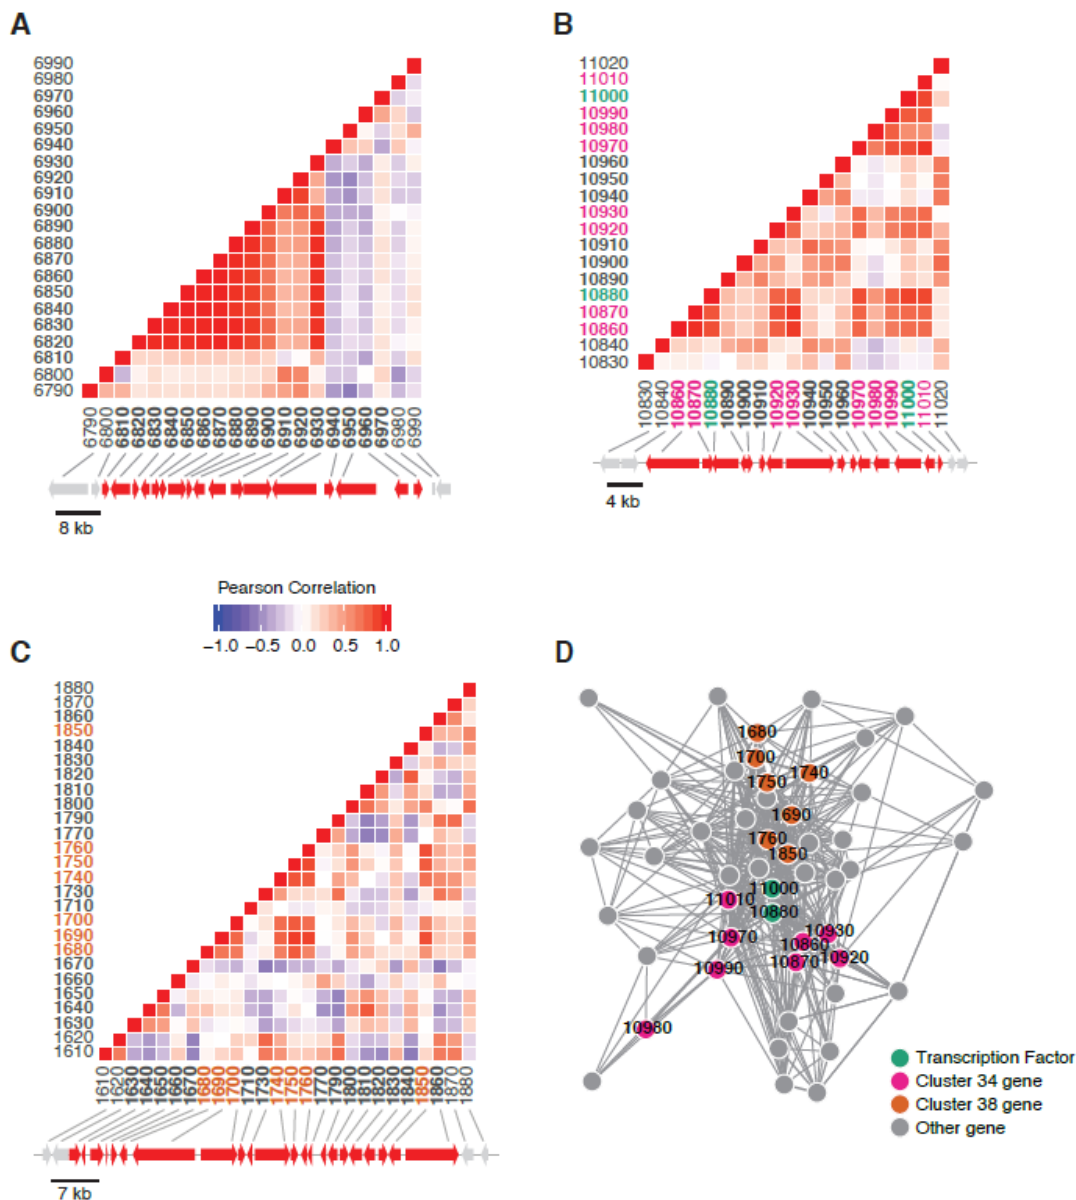

277

278 **Figure 1:** Heatmap depicting the Pearson's correlation of co-expression of genes within three canonical  
 279 BGCs. Across all panels, genes within the canonical cluster are bolded in the heatmap and colored red in  
 280 the accompanying chromosome segment. Two flanking genes are included on either side and colored  
 281 grey. Gene names have been abbreviated. (A) A significant fraction of genes within the fumonisin  
 282 metabolic gene cluster are co-expressed. (B) Co-expression of predicted BGC 34, which contains two  
 283 transcription factors. Both are colored green in the heatmap, and other clustered genes recovered in the  
 284 metamodel are colored pink. (C) A small fraction of genes within predicted BGC 38 are co-expressed.  
 285 Genes are color coded in the heatmap as in (A); genes recovered in a metamodel are colored orange.  
 286 (D) Network map of transcription factor metamodel containing all genes co-expressed with both  
 287 transcription factors across all three network analyses. Nodes in the map represent genes, and edges  
 288 connecting two genes represent the weight (transformed MR score) for the association. Transcription  
 289 factors are colored green. Other genes present in BGC 34 are colored pink. Genes present in BGC 38  
 290 are colored orange.

291

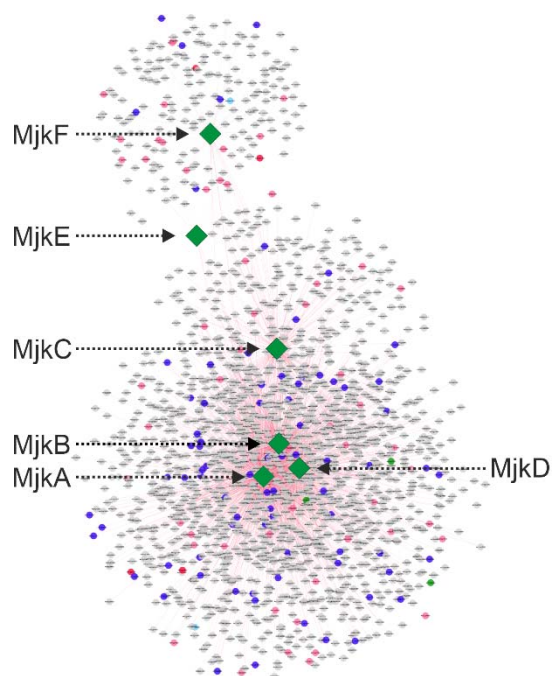

292  
 293 **Figure 2:** The largest Spearman sub-network containing predicted BGC core and tailoring genes  
 294 (highlighted in pink) as well as transcription factors (highlighted in blue). The six transcription factors  
 295 studied by molecular analyses in this study (MjKA-F) are indicated in green.  
 296

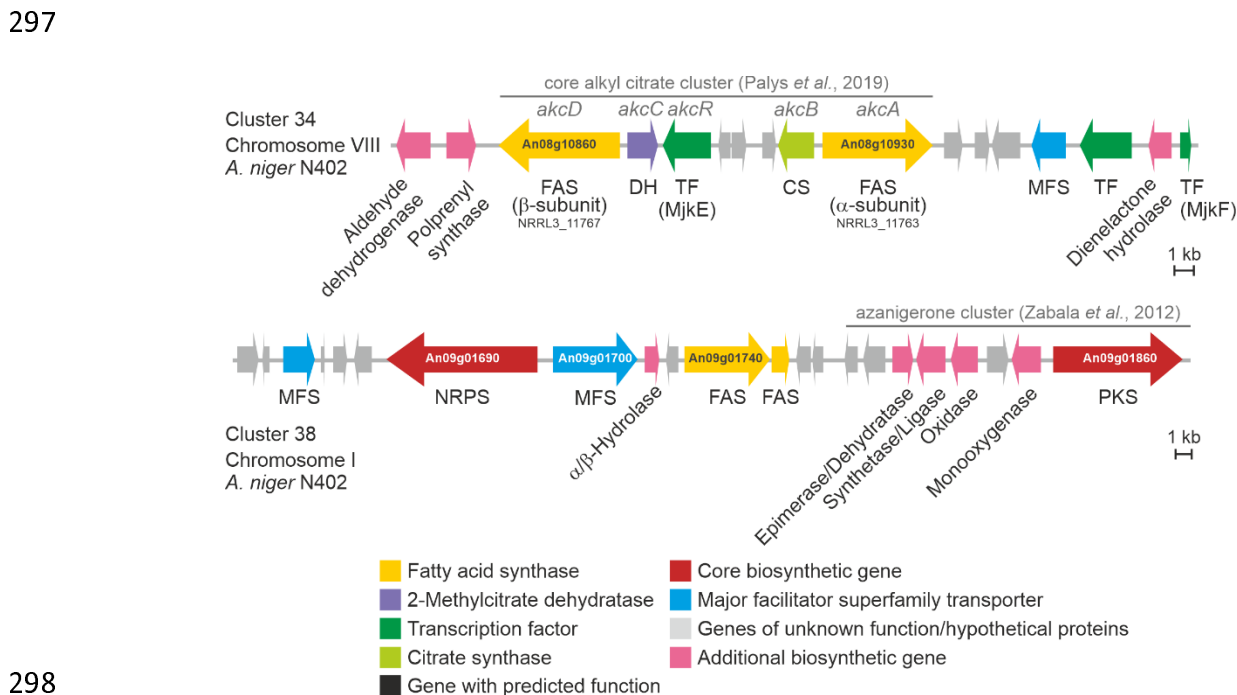

298  
 299 **Figure 3:** Schematic representation of BGC 34 and BGC 38 as predicted by antiSMASH. Based on  
 300 sequence similarity and gene functional prediction, BGC 34 corresponds to the alkyl citrate-producing  
 301 cluster identified in parallel to this study in *A. niger* NRRL3<sup>38</sup>. BGC 38 is positioned next to the  
 302 azanigerone cluster.

303 **Overexpression of predicted transcription factors MjkA-F modulate *A. niger***  
304 **pigmentation and development**

305  
306 Prior to conducting gene functional analysis experiments, we assessed gene expression  
307 profiles for *mjkA* - *mjkF* across our 155 cultivation conditions. While both *mjkE* and  
308 *mjkF*, which reside in BGC 34, were rarely expressed, the four *mjkA* – *mjkD* genes  
309 encoding unclustered TFs were transcribed under numerous conditions, with *mjkA*  
310 notably expressed to 90% the level of *A. niger* actin under several conditions (**Figure 4**).

311  
312 To assess the role of these TFs in modulating BGC expression, we generated  
313 conditional expression isolates in which a Tet-on gene switch was placed upstream of  
314 the open reading frame as previously described for the genes *mjkA* and *mjkB*<sup>33</sup>. This  
315 gene switch has undetectable levels of basal expression in the absence of induction,  
316 and addition of 10 µg/ml Dox enables expression above that of the *A. niger*  
317 glucoamylase gene, whose promoter is often used for overexpression studies<sup>33,39,40</sup>.  
318 Conditional expression isolates previously constructed for genes *mjkA* and *mjkB* were  
319 also analyzed in this study to further assess their role in *A. niger* secondary metabolism  
320 and development ([Supplemental Table 3](#)).

321  
322  
323  
324  
325

326

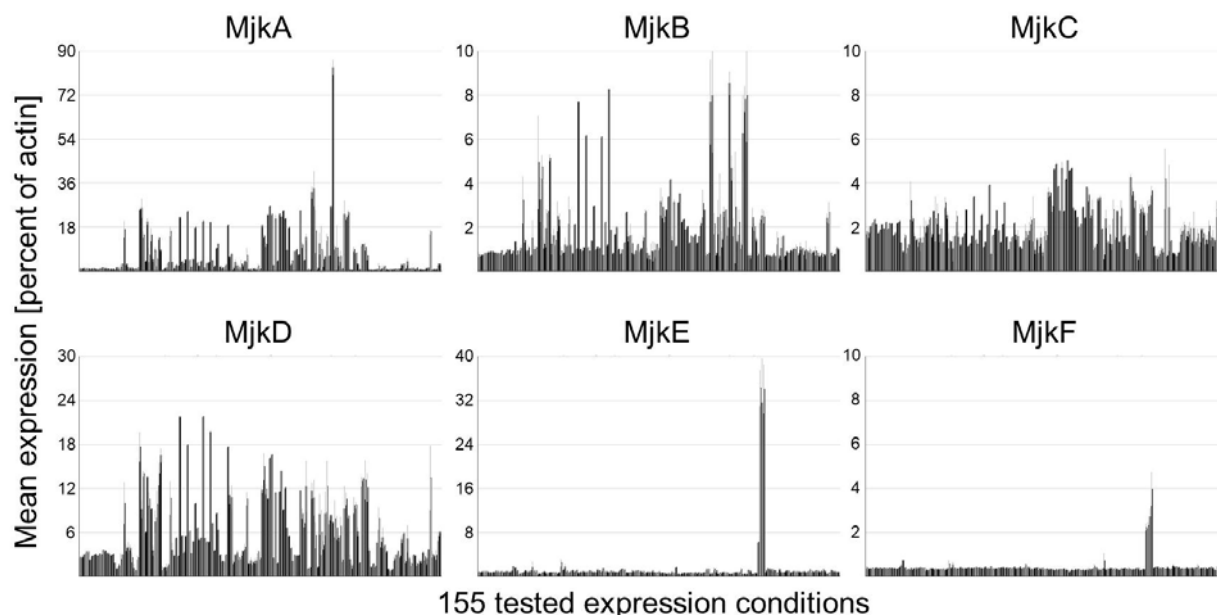

327

328 **Figure 4:** Expression levels for all 6 TFs in 155 expression conditions. Note the different scale bars. MjkE  
329 (An08g11000) and MjkF (An08g10880) are only expressed during maltose-limited bioreactor in  
330 developmental mutant deleted in the *flbA* gene<sup>41</sup>.

331

332

333 Standard growth assays on solid and in liquid media clearly identified differences in  
334 media pigmentation in overexpression isolates when compared to the progenitor control  
335 (Figure 5, Supplemental Figure 2), suggesting a role of these genes in *A. niger*  
336 development and/or secondary metabolism. The conditional expression strains MjkA,  
337 MjkD, and MjkF also displayed reduced growth on solid agar under overexpression  
338 conditions (Supplemental Figure 3). Intriguingly, *mjkA* overexpression also resulted in  
339 the formation of sclerotia (Figure 5), which are an important prerequisite for sexual  
340 development in *Aspergillus*<sup>42</sup>. However, *A. niger sensu stricto* has not been reported to  
341 have a sexual cycle. Still, *A. niger* rarely produces sclerotia under specific growth  
342 conditions, which are paralleled by the production of many secondary metabolites



343 including indolterpenes of the aflavinine type<sup>42</sup>. We thus re-analyzed transcriptomic data  
344 which were available for this isolate and for the MjkB overexpression strain from  
345 bioreactor cultivation<sup>33</sup> to screen for differential expression of developmental regulators  
346 following conditional MjkA and/or MjkB expression. Strikingly, the expression of 36 and  
347 27 regulators and TFs were affected when *mjkA* or *mjkB* were up- or downregulated,  
348 respectively (**Figure 6**). Notably, the overexpression of MjkA resulted in downregulation  
349 of genes encoding transcription factors known to control primary metabolism (*creA*,  
350 *areB*, *xlnR*, *amyR*, *prtT*, *pacC*, *crzA*, *hapX*, *farA*, *farB*, *acuB*<sup>43</sup>) and asexual development  
351 (*brlA*, *abaA*, *stuA*, *flbA*, *flbB*, *flbC*<sup>43</sup>) as well as chromatin structure (*laeA*, *velB*, *vipC*,  
352 *mtfA*, *hdaA*<sup>43</sup>) in *Aspergillus* (**Figure 6**). Deletion of *mjkA* caused strong upregulation of  
353 the regulator-encoding genes *areA*, *cpcA*, *msnA*, *csnE*, *flbD* and *vosA* (**Supplemental**  
354 **Table 4**) with functions in primary metabolism and development<sup>43</sup>, implying that MjkA is  
355 a global regulator of *A. niger* metabolism, differentiation and development and  
356 hierarchically placed on a higher level than so far known global regulators in *Aspergillus*  
357 mentioned above. Note that the MjkA encoding gene can be found in 61 / 83 sequenced  
358 *Aspergillus* genomes as identified by BLAST analyses (**Supplemental Table 5**).

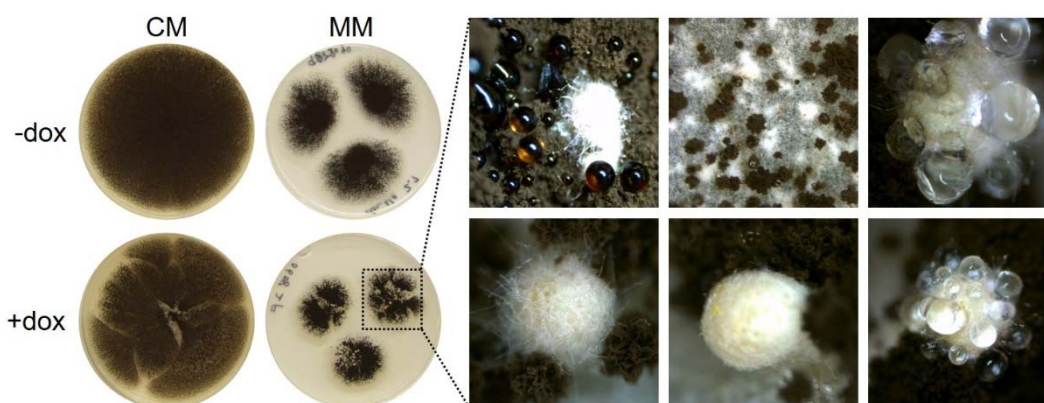

359  
360 **Figure 5:** Tet-on-based overexpression of *mjkA* modifies *A. niger* development. Overexpression of *mjkA*  
361 induced by the addition of 10 µg/ ml doxycycline leads to sclerotia formation on agar plates, especially  
362 when cultivated on minimal medium (MM).

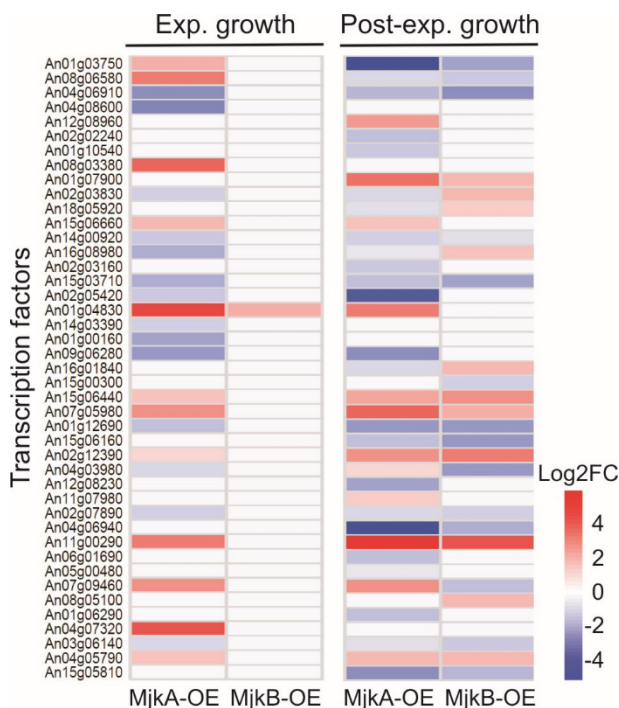

363  
364 **Figure 6:** Differential gene expression of transcription factors following overexpression of *mjkA* and *mjkB*  
365 genes during controlled bioreactor batch cultivations of *A. niger* performed in our previous study<sup>33</sup>. Note  
366 that overexpression of MjkA strongly affects expression of predicted regulators during both growth  
367 phases, whereas the effect of MjkB is limited to the post-exponential growth phase. ORF codes are given.

368  
369  
370 **Overexpression of predicted transcription factors MjkA-F modulates the**  
371 **secondary metabolite profile of *A. niger***

372  
373 To understand the effect of the MjkA-F TFs on the secondary metabolite profile of *A.*  
374 *niger*, we next conducted untargeted metabolome analysis of the progenitor strain and  
375 *mjkA-mjkF* conditional expression strains after 2, 4 or 10 days of incubation on minimal  
376 agar plates supplemented with 10 µg/ml Dox. For each overexpression strain, one  
377 single time point was selected for metabolome analysis. Time points were chosen when  
378 the greatest deviation in either media pigmentation or growth relative to the control  
379 strain was observed ([Supplemental Figure 3](#)). Since culture samples were harvested at

380 the center as well as the outer edges of the growing colonies and pooled for analysis,  
381 the obtained results comprise metabolites from both old and young mycelia. This  
382 analysis detected a total of 2,063 compounds, from which 1,835 were annotated.  
383 Metabolic pathway visualization of the identified metabolites using iPATH showed that  
384 intermediates from various biosynthetic routes towards SMs ([Supplemental Figures 4](#)  
385 [and 5](#)) were covered. Statistical analysis (*t*-test) identified numerous metabolites that  
386 were significantly different ( $p \leq 0.05$  and  $\log_2$  ratio  $> 1$  or  $-1$ ) for the compared genotypes  
387 and time points (**Figure 7A**).

388  
389 Generally, overexpression of *mjkC* and *mjkF* (2 days) as well as overexpression of *mjkA*  
390 and *mjkD* (4 days) each affected more than 140 metabolites (**Figure 7B**). Interestingly,  
391 only overexpression of *mjkC* led to an upregulation of more than half of the affected  
392 metabolites, whereas overexpression of *mjkA*, *mjkD* and *mjkF* led to down-regulation  
393 (**Figure 7B**). In comparison, overexpression of *mjkB* and *mjkE* (10 days) apparently  
394 affected fewer metabolites (66 and 43, respectively), which might also be due to a  
395 reduced overall metabolic activity of the cultures after prolonged cultivation.

396  
397 Amongst the significantly affected metabolites, several known SMs of *A. niger* and  
398 related species<sup>44</sup> could be putatively identified by means of LC-QTOF-HRMS based on  
399 mass and retention time (**Figure 7C**, [Supplemental Figures 6 and 7](#)). These compounds  
400 comprise naphtho- $\gamma$ -pyrones (aurasperones, isonigerone, fonsecin, carbonarins),  
401 bicoumarins (bicoumanigrin, kotanin, desmethylkotanin, funalenone), and fumonisins.  
402 Moreover, overexpression of the putative TFs affected meroterpenoids (1-

403 hydroxyyanuthone A) and benzoquinone-type pigments (atromentin, cycloleucomelone),  
404 as well as different types of alkaloids such as pyranonigrins, pyrophens (aspernigrin A,  
405 carbonarone A, nygerone A), nigragillins (nigragillin, nigerazine B), and tensidols. Not  
406 found amongst the significantly affected compounds were some known SMs of *A. niger*,  
407 which have already been linked to their corresponding BGCs, such as azanigerone<sup>37</sup>,  
408 TAN-1612<sup>45</sup>, and ochratoxin<sup>46</sup>.

409  
410 Notably, the list of previously identified SMs of *A. niger* almost exclusively comprised of  
411 polyketide products ([Supplemental Figure 6](#)). Thus, even though the peptide-forming  
412 NRPS from BGC 38 (An09g01690) is present in a mutual rank metamodule with MjkE  
413 and MjkF, the biosynthetic product of BGC 38 is unlikely to be one of the compounds  
414 identified in the current study. Based on an *in silico* assembly line prediction using  
415 antiSMASH, An09g01690 encodes a bimodular NRPS, which cannot be classified yet  
416 into a linear or iterative assembly type and its product is thus not predictable. Since it is  
417 co-expressed with two putative fatty acid synthase encoding genes (An09g01740,  
418 An09g01750) in BGC 38 (**Figure 1** and **Figure 3**), the encoded peptide presumably  
419 features a fatty acid moiety of varying length based on the available fatty acid pool of  
420 *A. niger*. Similar patterns have been observed for other nonribosomally synthesized  
421 lipopeptides such as daptomycin<sup>47</sup>.

422  
423 In parallel to this study, BGC 34 (**Figure 3**) was recently demonstrated to be responsible  
424 for alkyl citrate production in *A. niger* NRRL3<sup>38</sup>. For this SM class, a range of  
425 bioactivities has been reported, including antiparasitic<sup>48</sup>, antifungal<sup>49</sup> antibacterial<sup>50</sup>, and

426 plant root growth promotion effects<sup>51</sup>. Other complex alkyl citrates (zaragozic acids, also  
 427 called squalostatins) have been shown to be amongst the most potent natural squalene  
 428 synthase inhibitors<sup>52,53</sup>. Notably, the metabolome analysis in this study showed that  
 429 several alkyl citrates, such as hexylaconitic acid A, hexylitaconic acid J, tensyucic acid C  
 430 and E, were also differentially produced upon TF overexpression at different time points  
 431 (Figure 7C, Supplemental Figure 7).  
 432

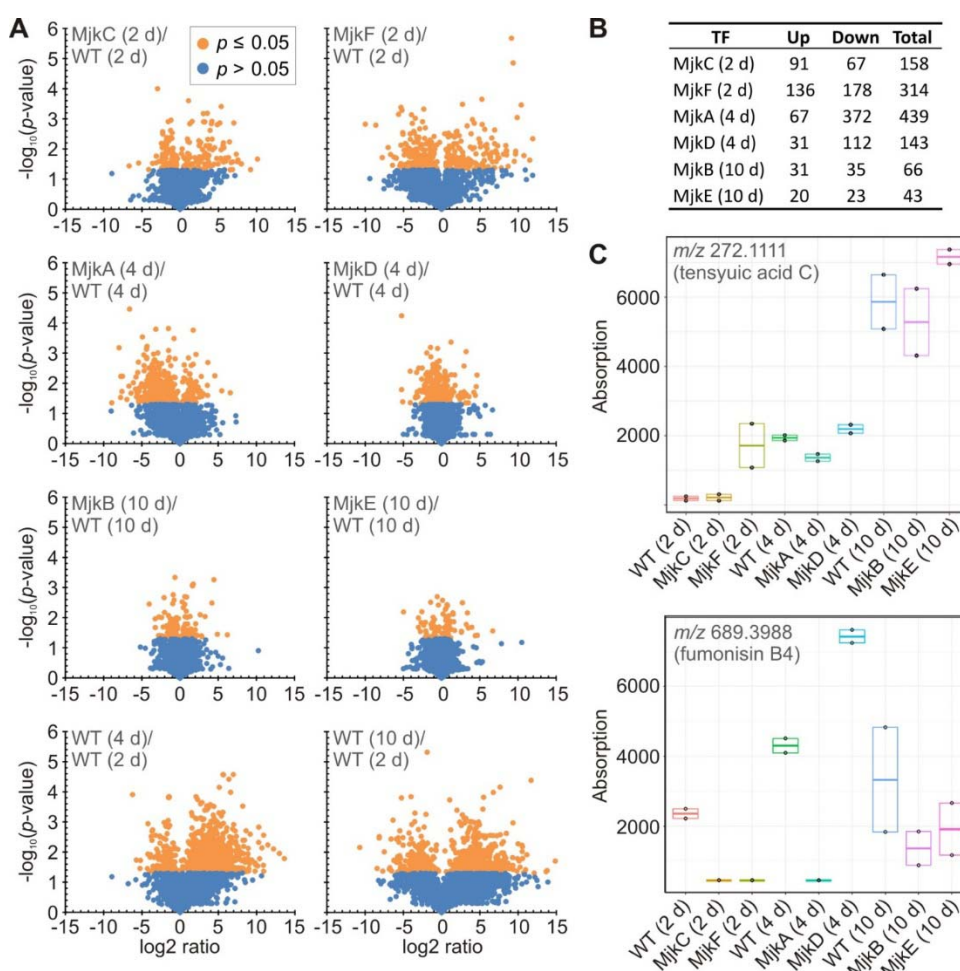

433 **Figure 7:** Overexpression of *mjkA* - *mjkF* genes affects numerous metabolites in *A. niger*. (A) Annotated  
 434 metabolites were plotted by significance ( $p$ -value) versus fold-change ( $\log_2$  ratio). Metabolites reaching a  
 435  $p$ -value  $< 0.05$  are marked orange. Metabolites with a  $p$ -value  $< 0.05$  and a  $\log_2$  ratio  $> 1$  or  $-1$   
 436 were considered significant. (B) Number of significantly affected metabolites ( $p$ -value  $< 0.05$  and  $\log_2$  ratio  $> 1$   
 437 or  $-1$ ) in comparison to the control strain. (C) Exemplary visualization of tensyucic acid C (alkyl citrate) and  
 438 fumonisin B4 abundances during cultivation of overexpression and control strains of *A. niger* on agar  
 439 plates at different time points (biological duplicates).  
 440

## 441 **Discussion**

442 This study has demonstrated that gene co-expression analysis enables the identification  
443 of fungal transcriptional networks in which secondary metabolite genes are embedded.  
444 By comparing mutual rank and Spearman derived co-expression networks, we have  
445 respectively identified both BGC resident and, additionally, unclustered TFs, a finding  
446 broadly consistent with the existence of SM regulatory genes that reside outside  
447 predicted BGC loci<sup>17</sup>. However, there is a growing body of evidence to suggest that, at  
448 least in some instances, there has been an over-reliance on physical clustering for the  
449 prediction of SM pathway genes and their cognate transporters/regulators. Indeed, with  
450 several notable exceptions<sup>54,55</sup>, it is still relatively rare that genes required for the  
451 biosynthesis of an entire fungal SM are firstly experimentally verified, and secondly, fully  
452 contiguously clustered. Thus, the true extent of SM pathway gene clustering in fungi  
453 remains unclear. This is further complicated by divergence in the degree in which the  
454 BGCs are 'intact' across fungal genomes, which is even true for 'gold standard' BGCs,  
455 such as those necessary for epipolythiodioxopiperazine synthesis (e.g.,  
456 gliotoxin/sirodesmin)<sup>54</sup>. Hence, experimental approaches to activate and functionally  
457 analyze the full fungal SM repertoire cannot exclusively rely on *in silico* genomics  
458 approaches.

459  
460 Given that co-expression approaches have only recently been applied to define fungal  
461 BGC boundaries and their transcriptional networks<sup>29,31,33,56</sup>, in this study we examined  
462 the potential utility of two different approaches for constructing co-expression networks,  
463 namely mutual rank and Spearman approaches. Our results suggest that both

464 approaches enable delineation and refinement of contiguous BGC boundaries.  
465 However, whereas the Spearman approach was better suited for the identification of  
466 global TFs, the mutual rank approach was better suited for the identification of pathway-  
467 specific TFs. This work should therefore guide future co-expression analyses of other  
468 fungal transcriptional datasets based on the requirements of the end user (i.e., global or  
469 pathway-specific studies).

470

471 Overexpression of six TF-encoding genes (*mjka-F*) predicted from co-expression  
472 networks to be involved in *A. niger* SM regulation enabled the modification of *A. niger*  
473 secondary metabolite profiles, which included the production of SMs that were not  
474 detected in the progenitor control ([Supplemental Figure 7](#)). Thus, wholesale modulation  
475 of fungal SMs in standard lab culture is possible using hypotheses derived from both  
476 Spearman/mutual rank network approaches. The simplicity of the culture conditions is  
477 an attractive aspect of the discovery pipeline in this work, which may be preferable  
478 when compared to more complex experimental setups, such as co-cultivation  
479 experiments, or isolation of novel metabolites from the complex fungal niche (e.g., soil)  
480 or marine environments<sup>57</sup>.

481

482 From a methodological perspective, our data support the notion that TF overexpression  
483 using an inducible gene switch is an effective strategy for SM activation, and probably is  
484 preferable to conventional gene deletion approaches<sup>33</sup>. It should be noted, however,  
485 that this study was clearly not able to activate all *A. niger* SMs, as we only analyzed SM  
486 profiles from a single growth stage/time point for each mutant. Therefore, we speculate

487 that activation of other metabolites will be observed at different culture  
488 conditions/growth phases. Consequently, the full exploration of the SM repertoire of *A.*  
489 *niger* isolates MjkA-F will be conducted in follow up studies. Where conservation of  
490 MjkA-F is observed in other fungal genomes, the functional analysis (i.e.,  
491 overexpression) of such orthologues to activate and discover other SM molecules  
492 appears feasible.

493  
494 An exciting observation during this study was that MjkA seemed to function at a  
495 hierarchy above major transcriptional regulators, such as CreA, AreA, PacC, BrIA, CrzA,  
496 and LeaA, to name but a few (**Figure 6**). Additionally, the formation of sclerotia due to  
497 overexpression of MjkA can be viewed as a preliminary (and tentative) step towards  
498 laboratory-controlled sex, opening up the possibility of classical genetics in this  
499 species<sup>58</sup>. Such developmental jackpots may be viewed as an additional benefit to  
500 wholesale analysis of fungal SMs using co-expression networks.

501  
502 In this work, we also conducted significant *in silico* and mass spectrometry-based  
503 characterization of differential SM production profiles and attempted to link empirically  
504 observed SMs to specific BGCs. Despite recent advances in publicly available tools for  
505 such experiments, including the prediction of putative SM structures based on the  
506 analysis of PKS/NRPS domains<sup>59</sup>, coupling BGCs to their products is still challenging. In  
507 this respect, linking BGCs amongst multiple differentially produced SMs between control  
508 and experimental cohorts remains a significant bottleneck in discovery pipelines and



509 requires experimental validation of putative BGC-metabolite candidates, e.g., by means  
510 of core gene knockout or overexpression.

511

512 In summary, this study has generated novel co-expression resources and methods for  
513 the microbial cell factory *A. niger*. Strains MjkA-F are promising tools for metabolite  
514 discovery and will be used in future to reverse engineer the transcriptional networks to  
515 which they belong. Our data clearly support the well-established prevalence of BGCs in  
516 filamentous fungal genomes, but suggest a refinement to this paradigm — whereby for  
517 activation and functional analysis experiments of SMs, it may be safer to consider that  
518 the necessary genes for a fungal SM of interest (including core genes, tailoring genes,  
519 transporters, detoxifiers, and regulators) may be unclustered, but can be identified by  
520 means of SCC as well as MR-PCC co-expression analyses. Such shifts in experimental  
521 thinking may help facilitate the full exploitation and comprehensive understanding of  
522 SMs amongst the fungal kingdom.

523

## 524 **Materials and Methods**

525

### 526 **Calculating mutual rank for microarray experiments**

527 *A. niger* microarrays across a range of experimental conditions and genetic  
528 backgrounds<sup>33</sup> were analyzed in R using the *affy*, *simpleaffy*, and *makecdfenv*  
529 packages<sup>60–62</sup>. Raw data from each of the 283 individual microarrays were normalized  
530 using RMA as implemented in the *affy* package<sup>60</sup>. To enable cross-experiment  
531 comparisons, expression values were normalized by scaling to the cross-experiment

532 trimmed mean (excluding the top and bottom 5% of expression values). Pearson's  
533 correlation coefficient was calculated between every pair of genes across all conditions.  
534 An ordered list of all genes from most to least correlated was generated for each gene.  
535 For every pair of genes, the mutual rank was calculated by taking the geometric mean  
536 of the rank of each gene in the other gene's ordered list. The mutual rank (MR) of two  
537 genes A and B is the geometric mean of each gene's correlation rank, and is given by  
538 the formula:

$$MutualRank_{A,B} = \sqrt{Rank_{A(B)} \times Rank_{B(A)}}$$

539 where  $Rank_{A(B)}$  is the rank of gene B in an ordered list of the correlation coefficients of  
540 all genes with respect to gene A ranked from most to least correlated<sup>34</sup>. MR scores were  
541 transformed to network edge weights using the exponential decay function  $e^{-(MR-1/x)}$ ;  
542 three different networks were constructed with  $x$  set to 5, 10, and 25, respectively.  
543 Edges with a Pearson's correlation coefficient < 0.3 or an edge weight < 0.1 were  
544 excluded from the global network, which was then visualized in Cytoscape<sup>63</sup>. Modules of  
545 co-expressed genes were inferred using ClusterONE with default parameters<sup>64</sup>.  
546 Modules were analyzed for the presence of transcription factors and for SM backbone  
547 genes based on protein domains found within these genes and from gene annotations  
548 predicted by antiSMASH<sup>65</sup>. For two transcription factors (MjkE and MjkF), results from  
549 all co-expression networks were combined by collapsing all modules containing these  
550 genes of interest into a meta-module of non-overlapping gene sets. For identification of  
551 shared clusters in *Aspergillus* species ([Supplemental Table 6](#)), MultiGeneBlast<sup>66</sup> was  
552 used with 83 available representative genome assemblies available on NCBI Assembly  
553 as search database.

554

## 555 **Strains and molecular techniques**

556 *A. niger* strains used in this study are summarized in [Supplemental Table 3](#). Media  
557 compositions, transformation of *A. niger*, strain purification and fungal chromosomal  
558 DNA isolation were as previously described<sup>67</sup>. Standard PCR and cloning procedures  
559 were used for the generation of all constructs<sup>68</sup> and all cloned fragments were confirmed  
560 by DNA sequencing. Correct integrations of constructs in *A. niger* were verified by  
561 Southern analysis<sup>68</sup>. For overexpressing *mjkC*, *mjkD*, *MjkE* and *mjkF*, the respective  
562 open reading frames were cloned into the Tet-on vector pVG2.2<sup>39</sup> and the resulting  
563 plasmids integrated as single or multiple copies at the *pyrG* locus of strain MA169.4.  
564 Details on cloning protocols, primers used and Southern blot results are available upon  
565 request from the authors.

566

## 567 **Growth assays**

568 Strains were grown at 30°C in minimal medium (MM) or complete medium (CM),  
569 consisting of MM supplemented with 1% yeast extract and 0.5% casamino acids as  
570 described previously<sup>69</sup>. When indicated, solid or liquid media were supplemented with  
571 doxycycline (DOX) to a final concentration of 10 µg/ml. For the growth assay on plates,  
572 10<sup>5</sup> spores were inoculated on CM or MM +/- DOX and grown for up to 6 days. For  
573 shake flask cultivations, freshly harvested spores were inoculated into 50 ml of MM  
574 (10<sup>6</sup>/ml) and grown at 30°C, 200 rpm. DOX was added after 16 hr of inoculation  
575 (~exponential phase) and afterwards every 24 hr until 92 hr. Strain MJK17.25 served as  
576 control strain.

577

## 578 **Metabolome profiling**

579 Metabolites were extracted from colonies of *A. niger* MJK17.25 grown on agar plates  
580 (independent biological duplicates) by METABOLON (Potsdam, Germany). In brief,  
581 three agar plugs (outer edge to plate, centre of colony, outer edge adjacent to next  
582 colony) were collected at different time points from a colony cultivated for 2 – 10 days  
583 on minimal agar medium and pooled in one reaction tube. Each sample was extracted  
584 in a concentration of 0.5 g/ml with isopropanol:ethyl acetate (1:3, v/v) by ultrasound for  
585 60 min and centrifuged at 4°C at 13,500 rpm for 20 min. The supernatant was sterile  
586 filtrated (Carl Roth, 0.22µm) and transferred in a new eppendorf tube. All subsequent  
587 steps were carried out at METABOLON (Potsdam, Germany). Metabolites were  
588 identified in comparison to METABOLON's database entries of authentic standards. The  
589 LC separation was performed using hydrophilic interaction chromatography with a  
590 iHILIC®-Fusion, 150x2.1 mm, 5µm, 200 Å column (HILICON, Umeå Sweden), operated  
591 by an Agilent 1290 UPLC system (Agilent, Santa Clara, USA).

592 The LC mobile phase was A) 10 mM Ammonium acetate (Sigma-Aldrich, USA) in water  
593 (Thermo, USA) with 95% acetonitrile (Thermo, USA; pH 6) and B) acetonitrile with 5%  
594 10 mM Ammonium acetate in 95% water. The LC mobile phase was a linear gradient  
595 from 95% to 65% acetonitrile over 8.5 min, followed by linear gradient from 65% to 5%  
596 acetonitrile over 1 min, 2.5 min wash with 5% and 3 min re-equilibration with 95%  
597 acetonitrile (flow rate 400 µl/min). Mass spectrometry was performed using a high-  
598 resolution 6540 QTOF/MS Detector (Agilent, Santa Clara, USA). Spectra were recorded  
599 in a mass range from 50 *m/z* to 1700 *m/z* in positive and negative ionization mode. The

600 measured metabolite concentration was normalized to the internal standard. Significant  
601 concentration changes of metabolites in different samples were analyzed by appropriate  
602 statistical test procedures (Students test, Welch test, Mann-Whitney test). A  $p$ -value  
603  $< 0.05$  was considered as significant.

604

## 605 **Acknowledgements**

606 We would like to thank the European Commission for funding (Marie Curie International  
607 Training Network QuantFung, FP7-People-2013- ITN, grant no. 607332) and the  
608 National Science Foundation (<http://www.nsf.gov>) for funding grants IOS-1401682 and  
609 DEB-1831493 to J.H.W. This work was conducted in part using computational  
610 resources provided by the Advanced Computing Center for Research and Education at  
611 Vanderbilt University and Information Technology at Purdue. We acknowledge support  
612 by the German Research Foundation and the Open Access Publication Funds of TU  
613 Berlin.

614 **References**

- 615 1. Keller, N. P. Fungal secondary metabolism: regulation, function and drug  
616 discovery. *Nature Reviews Microbiology* (2019).
- 617 2. Keller, N. P., Turner, G. & Bennett, J. W. Fungal secondary metabolism: from  
618 biochemistry to genomics. *Nat Rev Micro* **3**, 937–947 (2005).
- 619 3. Newman, D. J. & Cragg, G. M. Natural products as sources of new drugs from  
620 1981 to 2014. *Journal of Natural Products* **79**, 629–661 (2016).
- 621 4. Liu, Y. & Wu, F. Global burden of Aflatoxin-induced hepatocellular carcinoma: A  
622 risk assessment. *Environ. Health Perspect.* (2010).
- 623 5. Meyer, V. *et al.* Current challenges of research on filamentous fungi in relation to  
624 human welfare and a sustainable bio-economy: a white paper. *Fungal Biol.*  
625 *Biotechnol.* **3**, 1–17 (2016).
- 626 6. Frisvad, J. C. *et al.* Fumonisin and ochratoxin production in industrial *Aspergillus*  
627 *niger* strains. *PLoS One* **6**, (2011).
- 628 7. Pusztahelyi, T., Holb, I. J. & Pócsi, I. Secondary metabolites in fungus-plant  
629 interactions. *Front. Plant Sci.* **6**, 573 (2015).
- 630 8. Fisher, M. C. *et al.* Emerging fungal threats to animal, plant and ecosystem  
631 health. *Nature* **484**, 186–194 (2012).
- 632 9. Meyer, V. *et al.* Growing a circular economy with fungal biotechnology: a white  
633 paper. *Fungal Biol. Biotechnol.* **7**, 5 (2020).
- 634 10. Rokas, A., Wisecaver, J. H. & Lind, A. L. The birth, evolution and death of  
635 metabolic gene clusters in fungi. *Nature Reviews Microbiology* (2018).  
636 doi:10.1038/s41579-018-0075-3

- 637 11. Khaldi, N. *et al.* SMURF: Genomic mapping of fungal secondary metabolite  
638 clusters. *Fungal Genet. Biol.* **47**, 736–741 (2010).
- 639 12. Weber, T. *et al.* antiSMASH 3.0-a comprehensive resource for the genome mining  
640 of biosynthetic gene clusters. *Nucleic Acids Res.* **43**, W237-43 (2015).
- 641 13. Wang, D.-N. *et al.* GliA in *Aspergillus fumigatus* is required for its tolerance to  
642 gliotoxin and affects the amount of extracellular and intracellular gliotoxin. *Med.*  
643 *Mycol.* **52**, 506 (2014).
- 644 14. Chang, P. K., Yu, J. & Yu, J. H. *affT*, a MFS transporter-encoding gene located in  
645 the aflatoxin gene cluster, does not have a significant role in aflatoxin secretion.  
646 *Fungal Genet. Biol.* **41**, 911–920 (2004).
- 647 15. Schrettl, M. *et al.* Self-protection against gliotoxin--a component of the gliotoxin  
648 biosynthetic cluster, GliT, completely protects *Aspergillus fumigatus* against  
649 exogenous gliotoxin. *PLoS Pathog.* **6**, e1000952–e1000952 (2010).
- 650 16. Macheleidt, J. *et al.* Regulation and role of fungal secondary metabolites. *Annu.*  
651 *Rev. Genet.* **50**, 371–392 (2016).
- 652 17. Brakhage, A. A. regulation of fungal secondary metabolism. *Nat Rev Micro* **11**,  
653 21–32 (2013).
- 654 18. Bergmann, S. *et al.* Genomics-driven discovery of PKS-NRPS hybrid metabolites  
655 from *Aspergillus nidulans*. *Nat. Chem. Biol.* **3** (4):213-7 (2007).
- 656 19. Bok, J. W. *et al.* GliZ, a transcriptional regulator of gliotoxin biosynthesis,  
657 contributes to *Aspergillus fumigatus* virulence. *Infect. Immun.* **74**, 6761–6768  
658 (2006).
- 659 20. Marui, J. *et al.* Kojic acid biosynthesis in *Aspergillus oryzae* is regulated by a

- 660 Zn(II)2Cys 6 transcriptional activator and induced by kojic acid at the  
661 transcriptional level. *J. Biosci. Bioeng.* **112**(1) 40-3 (2011).
- 662 21. Niehaus, E. M. *et al.* Apicidin F: Characterization and genetic manipulation of a  
663 new secondary metabolite gene cluster in the rice pathogen *Fusarium fujikuroi*.  
664 *PLoS One*: 9(7): e103336. (2014).
- 665 22. Bayram, Ö. *et al.* VelB/VeA/LaeA complex coordinates light signal with fungal  
666 development and secondary metabolism. *Science.* **320**, 1504–1506 (2008).
- 667 23. Sigl, C. *et al.* Among developmental regulators, StuA but not BrlA is essential for  
668 penicillin v production in *Penicillium chrysogenum*. *Appl. Environ. Microbiol.* **77**,  
669 972–982 (2011).
- 670 24. Karimi-Aghcheh, R. *et al.* Functional analyses of *Trichoderma reesei* LAE1 reveal  
671 conserved and contrasting roles of this regulator. *G3; Genes/Genomes/Genetics*  
672 **3**, 369–378 (2013).
- 673 25. Perrin, R. M. *et al.* Transcriptional regulation of chemical diversity in *Aspergillus*  
674 *fumigatus* by LaeA. *PLoS Pathog.* **3**, 508–517 (2007).
- 675 26. Haas, H. Fungal siderophore metabolism with a focus on *Aspergillus fumigatus*.  
676 *Nat. Prod. Rep.* **31**, 1266–1276 (2014).
- 677 27. Zhang, S., Schwelm, A., Jin, H., Collins, L. J. & Bradshaw, R. E. A fragmented  
678 aflatoxin-like gene cluster in the forest pathogen *Dothistroma septosporum*.  
679 *Fungal Genet. Biol.* **12**, 1342-54 (2007).
- 680 28. Wiemann, P. *et al.* Prototype of an intertwined secondary-metabolite supercluster.  
681 *Proc. Natl. Acad. Sci. U. S. A.* **110**, 17065–70 (2013).
- 682 29. Andersen, M. R. *et al.* Accurate prediction of secondary metabolite gene clusters



- 683 in filamentous fungi. *Proc Natl Acad Sci U S A* **110**, E99-107 (2013).
- 684 30. Tang, M. C. *et al.* Discovery of unclustered fungal indole diterpene biosynthetic  
685 pathways through combinatorial pathway reassembly in engineered yeast. *J. Am.*  
686 *Chem. Soc.* **137**, 43 (2015).
- 687 31. Vesth, T. C., Brandl, J. & Andersen, M. R. FunGeneClusterS: Predicting fungal  
688 gene clusters from genome and transcriptome data. *Synth. Syst. Biotechnol.* **1**,  
689 122–129 (2016).
- 690 32. Cairns, T. & Meyer, V. *In silico* prediction and characterization of secondary  
691 metabolite biosynthetic gene clusters in the wheat pathogen *Zymoseptoria tritici*.  
692 *BMC Genomics* **18**, (2017).
- 693 33. Schäpe, P. *et al.* Updating genome annotation for the microbial cell factory  
694 *Aspergillus niger* using gene co-expression networks. *Nucleic Acids Res.* **47**, 2,  
695 559–569 (2019).
- 696 34. Obayashi, T. & Kinoshita, K. Rank of correlation coefficient as a comparable  
697 measure for biological significance of gene coexpression. *DNA Res.* **16**, 249–260  
698 (2009).
- 699 35. Liesecke, F. *et al.* Ranking genome-wide correlation measurements improves  
700 microarray and RNA-seq based global and targeted co-expression networks. *Sci.*  
701 *Rep.* **8**, 10885 (2018).
- 702 36. Wisecaver, J. H. *et al.* A global coexpression network approach for connecting  
703 genes to specialized metabolic pathways in plants. *Plant Cell* **29**, 944–959 (2017).
- 704 37. Zabala, A. O., Xu, W., Chooi, Y.-H. & Tang, Y. Characterization of a silent  
705 azaphilone gene cluster from *Aspergillus niger* ATCC 1015 reveals a

- 706 hydroxylation-mediated pyran-ring formation. *Chem. Biol.* **19**, 1049–1059 (2012).
- 707 38. Palys, S., Pham, T. T. M. & Tsang, A. Biosynthesis of alkylcitric acids in  
708 *Aspergillus niger* involves both co-localized and unlinked genes. *bioRxiv* 714071  
709 (2019). doi:10.1101/714071
- 710 39. Meyer, V. *et al.* Fungal gene expression on demand: an inducible, tunable, and  
711 metabolism-independent expression system for *Aspergillus niger*. *Appl Env.*  
712 *Microbiol* **77**, 2975–2983 (2011).
- 713 40. Wanka, F. *et al.* Tet-On, or Tet-Off, that is the question: Advanced Conditional  
714 Gene Expression in *Aspergillus*. *Fungal Genet. Biol.* **89**. 72-83 (2016)
- 715 41. Van Munster, J. M. *et al.* Systems approaches to predict the functions of  
716 glycoside hydrolases during the life cycle of *Aspergillus niger* using  
717 developmental mutants  $\Delta brlA$  and  $\Delta flbA$ . *PLoS One* **10**(1): e0116269 (2015).
- 718 42. Frisvad, J. C., Petersen, L. M., Lyhne, E. K. & Larsen, T. O. Formation of sclerotia  
719 and production of indoloterpenes by *Aspergillus niger* and other species in  
720 Section Nigri. *PLoS One* **9**, e94857 (2014).
- 721 43. Cerqueira, G. C. *et al.* The *Aspergillus* Genome Database: Multispecies curation  
722 and incorporation of RNA-Seq data to improve structural gene annotations.  
723 *Nucleic Acids Res.* **42**, (2014).
- 724 44. Nielsen, K. F., Mogensen, J. M., Johansen, M., Larsen, T. O. & Frisvad, J. C.  
725 Review of secondary metabolites and mycotoxins from the *Aspergillus niger*  
726 group. *Analytical and Bioanalytical Chemistry* **395**, 1225–1242 (2009).
- 727 45. Li, Y., Chooi, Y. H., Sheng, Y., Valentine, J. S. & Tang, Y. Comparative  
728 characterization of fungal anthracenone and naphthacenedione biosynthetic

- 729 pathways reveals an  $\alpha$ -hydroxylation-dependent claisen-like cyclization catalyzed  
730 by a dimanganese thioesterase. *J. Am. Chem. Soc.* **133** (39), 15773-15785  
731 (2011).
- 732 46. Gallo, A. *et al.* New insight into the ochratoxin a biosynthetic pathway through  
733 deletion of a nonribosomal peptide synthetase gene in *Aspergillus carbonarius*.  
734 *Appl. Environ. Microbiol.* **78** (23) 8208-8218 (2012).
- 735 47. Miao, V. *et al.* Daptomycin biosynthesis in *Streptomyces roseosporus*: Cloning  
736 and analysis of the gene cluster and revision of peptide stereochemistry.  
737 *Microbiology.* **151** (5) (2005).
- 738 48. Matsumaru, T. *et al.* Synthesis and biological properties of tensyucic acids B, C,  
739 and E, and investigation of the optical purity of natural tensyucic acid B.  
740 *Tetrahedron.* **64** (31-32), 7369-7377 (2008).
- 741 49. Koch, L. *et al.* Sensitivity of *Neurospora crassa* to a marine-derived *Aspergillus*  
742 *tubingensis* anhydride exhibiting antifungal activity that is mediated by the MAS1  
743 protein. *Mar. Drugs.* **12** (9): 4713–4731 (2014).
- 744 50. Hasegawa, Y., Fukuda, T., Hagimori, K., Tomoda, H. & Omura, S. Tensyucic  
745 acids, new antibiotics produced by *Aspergillus niger* FKI-2342. *Chem. Pharm.*  
746 *Bull.* **55** (9) 1338-41 (2007).
- 747 51. Isogai, A., Washizu, M., Kondo, K., Murakoshi, S. & Suzuki, A. Isolation and  
748 identification of (+)-hexylitaconic acid as a plant growth regulator. *Agricultural and*  
749 *Biological Chemistry.* **48**:10, 2607-2609 (1984).
- 750 52. Wilson, K. E., Burk, R. M., Biftu, T., Ball, R. G. & Hoogsteen, K. Zaragozic Acid A,  
751 a potent inhibitor of squalene synthase: Initial chemistry and absolute

- 752 stereochemistry. *J. Org. Chem.* **57** (26) 7151-7158 (1992)
- 753 53. Dawson, M. J. *et al.* The squalostatins, novel inhibitors of squalene synthase  
754 produced by a species of phoma: I. Taxonomy, fermentation, isolation, physico-  
755 chemical properties and biological activity. *J. Antibiot. (Tokyo)*. **45** (5). 639-47  
756 (1992).
- 757 54. Patron, N. J. *et al.* Origin and distribution of epipolythiodioxopiperazine (ETP)  
758 gene clusters in filamentous ascomycetes. *BMC Evol. Biol.* **7**, 174 (2007).
- 759 55. Tsai, H. F., Wheeler, M. H., Chang, Y. C. & Kwon-Chung, K. J. A developmentally  
760 regulated gene cluster involved in conidial pigment biosynthesis in *Aspergillus*  
761 *fumigatus*. *J. Bacteriol.* **181**, 6469–6477 (1999).
- 762 56. de Vries, R. P. *et al.* Comparative genomics reveals high biological diversity and  
763 specific adaptations in the industrially and medically important fungal genus  
764 *Aspergillus*. *Genome Biol.* **18**, (2017).
- 765 57. Nai, C. & Meyer, V. From axenic to mixed cultures: technological advances  
766 accelerating a paradigm shift in microbiology. *Trends in Microbiology.* **26** (6) 538-  
767 554 (2017).
- 768 58. Todd, R. B., Davis, M. A. & Hynes, M. J. Genetic manipulation of *Aspergillus*  
769 *nidulans*: Meiotic progeny for genetic analysis and strain construction. *Nat.*  
770 *Protoc.* **2** (4). 811-21 (2007).
- 771 59. Blin, K. *et al.* antiSMASH 5.0: updates to the secondary metabolite genome  
772 mining pipeline. *Nucleic Acids Res.* **2**;47 (2019).
- 773 60. Gautier, L., Cope, L., Bolstad, B. M. & Irizarry, R. A. affy--analysis of Affymetrix  
774 GeneChip data at the probe level. *Bioinformatics* **20**, 307–315 (2004).

- 775 61. Irizarry RA, Gautier L, Huber W, Bolstad B (2019). *makecdfenv: CDF*  
776 *Environment Maker*. R package version 1.62.0.
- 777 62. Miller CJ (2019). simpleaffy: Very simple high level analysis of Affymetrix data.  
778 <http://www.bioconductor.org>, <http://bioinformatics.picr.man.ac.uk/simpleaffy/>.  
779 (2018).
- 780 63. Shannon, P. *et al.* Cytoscape: a software environment for integrated models of  
781 biomolecular interaction networks. *Genome Res.* **13**, 2498–504 (2003).
- 782 64. Nepusz, T., Yu, H. & Paccanaro, A. Detecting overlapping protein complexes in  
783 protein-protein interaction networks. *Nat. Methods* **9**, 471–472 (2012).
- 784 65. Medema, M. H. *et al.* antiSMASH: rapid identification, annotation and analysis of  
785 secondary metabolite biosynthesis gene clusters in bacterial and fungal genome  
786 sequences. *Nucleic Acids Res.* **39**, W339-46 (2011).
- 787 66. Medema, M. H., Takano, E. & Breitling, R. Detecting sequence homology at the  
788 gene cluster level with multigeneblast. *Mol. Biol. Evol.* **30**, 1218–1223 (2013).
- 789 67. Meyer, V., Punt, P. J. & Ram, A. F. J. Genetics, genetic manipulation, and  
790 approaches to strain improvement of filamentous fungi. in *Manual of Industrial*  
791 *Microbiology and Biotechnology, Third Edition* (2014).  
792 doi:10.1128/9781555816827.ch22
- 793 68. Green, M. R. & Sambrook, J. *Molecular cloning*: a laboratory manual. **1–3**, (Cold  
794 Spring Harbor, N.Y.: Cold Spring Harbor Laboratory Press, 2012).
- 795 69. Arentshorst, M., Ram, A. F. J. & Meyer, V. Using non-homologous end-joining-  
796 deficient strains for functional gene analyses in filamentous fungi. *Methods Mol.*  
797 *Biol.* **835**, 133–150 (2012).
